# Supplementary material for: Exploring the Mechanism of Activation of CFTR by Curcuminoids: An Ensemble Docking Study
Source: Preprints.org preprint supplement (doi:10.20944/preprints202311.0509.v1), 2023-11-08
Supplement: Supplementary file 1 [file supplementary]

CFTR/BSc3596

CFTR/diketo curcumin

closed
channel

open
channel

CFTR/keto-enol curcumin

CFTR/diketo curcumin

8 Å

CFTR/BSc3596

CFTR/keto-enol curcumin

**Figure S1. RMSD traces of the MD simulations.** RMSDs calculated on the CFTR conformer backbone atoms aligned to the parent PDB structures kickstarting the MD simulations (closed CFTR, PDB 5UAK; open CFTR, PDB 6MSM). The closed channels exhibit greater RMSD fluctuation than the open channels owing to the higher conformational freedom of the former (undimerized NBDs) with respect to the latter (dimerized NBDs).
